# Supplementary material for: Criteria for a unique steady state for enzymatic depectinization of bael (Aegle marmelos) juice in a continuous stirred tank reactor
Source: Royal Society of Chemistry journal article supplement (doi:10.1039/c7re00212b), 2018-01-01
Supplement: c7re00212b1.pdf [file c7re00212b1.pdf]

## **Supporting Information**

### **Criteria for unique steady state for enzymatic depectinization of bael (*Aegle marmelos*) juice in a continuous stirred tank reactor**

Sourav Sengupta, Amit Jain, Sirshendu De\*

Department of Chemical Engineering, Indian Institute of Technology Kharagpur, Kharagpur-  
721 302, India

\* Corresponding author

Tel: 91-3222-283926

Fax: 91-3222-255303

E-mail: [sde@che.iitkgp.ernet.in](mailto:sde@che.iitkgp.ernet.in)

## A. Theory of Contraction Mapping

Let  $f : X \rightarrow X$  represent a mapping from set  $X$  to itself. Then, a point  $x \in X$  is referred to as a fixed point (steady state) of  $f$ , if  $f(x) = x$ . As a corollary of the intermediate value theorem<sup>1</sup>, it follows that if  $[a, b]$  is a closed interval, then any continuous function  $f$  has at least one fixed point. The requisite criterion that decides whether there is a unique fixed point is given by contraction mapping theorem. In this context, contraction mapping theorem (also known as Banach's fixed-point theorem) may be stated as <sup>2,3</sup>

*Theorem:* In a complete metric space,  $f$  is a map such that

$$d(f(x), f(x')) \leq c d(x, x') \quad (\text{A.1})$$

where,  $d$  is metric and physically it signifies the difference between two functions and is defined as  $d(u, v) = |u - v|$ .  $c$  is a real valued constant ( $0 \leq c < 1$ ). If Eq. (A.1) is valid then  $f(x)$  has unique fixed point (steady state). Moreover, for any  $x_0 \in X$ , the sequence of iterates  $x_0, f(x_0), f(f(x_0)), \dots$  converges to the fixed point of  $f$ . Now, a Taylor series expansion of  $f(x)$  about  $x_0$  gives

$$f(x) = f(x_0) + (x - x_0)f'(x_0) + \frac{(x - x_0)^2}{2!} f''(x_0) + \dots \quad (\text{A.2})$$

Using two dummy variables  $u$  and  $v$  such that  $u, v \in x$  and using Taylor series expansion as Eq. (A.2), the following expression is obtained.

$$f(u) - f(v) = (u - v)f'(v) \quad (\text{A.3})$$

$$\text{Now, } d(f(u), f(v)) = |f(u) - f(v)| = |f'(v)| |u - v| = z d(u, v) \quad (\text{A.4})$$

where,  $z = |f'(v)|$

Thus, considering Eqs. (A.1) and (A.4) together, to satisfy the condition of existence of a unique steady state,  $z$  should be always less than 1, i.e.,  $z_{\max} < 1$ .

## References

- 1 W. Rudin, *Principles of Mathematical Analysis*, McGraw-Hill, 1976.
- 2 S. Pushpavanam, *Mathematical Methods in Chemical Engineering*, PHI Learning, 1998.
- 3 V. I. Istratescu, *Fixed Point Theory: An Introduction*, Springer Netherlands, 2001.

## B. Analysis of unique steady state for non-ideal CSTR

The schematic of the non-ideal CSTR is depicted in Fig. 6 in the main manuscript. The associated variables are also defined in the main manuscript.

Performing a material balance of reactant A at junction Q yields the following equation

$$C_{A0}v_b + C_{As}v_s = C_A(v_b + v_s) \quad (\text{B.1})$$

The above equation may be expressed in terms of  $C_A$  as

$$C_A = F C_{A0} + (1 - F)C_{As} \quad (\text{B.2})$$

where,  $E = V_s / V$  and  $F = v_b / v_0$ .  $E$  is the volume fraction of the reaction zone, while  $F$  is the fraction of volumetric flow rate bypassing the zone of reaction.

Assuming steady state operation, a substrate balance at steady state results in the following relation

$$v_s C_{A0} - v_s C_{As} - V_s \frac{v_{max} C_{As}}{K_M + C_{As}} = 0 \quad (B.3)$$

Eq. (B.3) may be rearranged as

$$Y = \frac{1 + \beta Y}{1 + \beta Y + D} = f(Y) \quad (B.4)$$

$$\text{where, } x = \frac{C_A}{C_{A0}}, Y = \frac{C_{As}}{C_{A0}} = \frac{x - F}{1 - F}, D = \frac{\alpha E}{1 - F}$$

$\alpha$  and  $\beta$  are already defined in the main manuscript as  $\alpha = \frac{V_{max}}{K_M v_0}$ ,  $\beta = \frac{C_{A0}}{K_M}$ .

Now,  $0 \leq Y \leq 1$ ,  $0 \leq f(Y) \leq 1$

$$\text{Also, } z_Y = \frac{df(Y)}{dY} = \frac{\beta D}{(1 + D + \beta Y)^2} \quad (B.5)$$

Applying the principle of contraction mapping (similar to the approach followed for ideal reactor), the condition for unique steady state is

$$\beta D < (1 + D)^2 \quad (B.6)$$

Eq. (B.6) may be expressed in terms of residence time of the non-ideal CSTR ( $\tau_M$ ) and other reactor and kinetic parameters as

$$\tau_{NI} > \left( \frac{1-F}{E} \right) \left( \frac{C_{A0} - 2K_M + \sqrt{C_{A0}K_M \left( \frac{C_{A0}}{K_M} - 4 \right)}}{2v_{\max}} \right) \quad (\text{B.7})$$

Thus, the critical residence time for a non-ideal CSTR is given as

$$\tau_{crit,NI} = \left( \frac{1-F}{E} \right) \left( \frac{C_{A0} - 2K_M + \sqrt{C_{A0}K_M \left( \frac{C_{A0}}{K_M} - 4 \right)}}{2v_{\max}} \right) \quad (\text{B.8})$$
